# Supplementary material for: Carbon-mediated synthesis of shape-controllable manganese phosphate as nanozymes for modulation of superoxide anions in HeLa cells
Source: Royal Society of Chemistry journal article supplement (doi:10.1039/c8tb02573h), 2018-11-29
Supplement: c8tb02573h1.pdf [file c8tb02573h1.pdf]

## Supporting Information

### **Carbon-mediated synthesis of shape-controllable manganese phosphate as Nanozyme for modulation of superoxide anions in Hela cells**

Xuan Cai <sup>a</sup>, Zhenxing Wang <sup>a</sup>, Huanhuan Zhang <sup>a</sup>, Yufei Li <sup>a</sup>, Kaicha Chen <sup>a</sup>, Hongli

Zhao <sup>\*a</sup> and Minbo Lan <sup>\*a,b</sup>

<sup>a</sup> *Shanghai Key Laboratory of Functional Materials Chemistry, School of Chemistry and Molecular Engineering, East China University of Science and Technology, Shanghai 200237, PR China*

<sup>b</sup> *State Key Laboratory of Bioreactor Engineering, East China University of Science and Technology, Shanghai 200237, PR China*

*\* Corresponding authors. H. Zhao, E-mail: [honglizhao@ecust.edu.cn](mailto:honglizhao@ecust.edu.cn), Tel: +86-21-64250557;*

*M. Lan, E-mail: [minbolan@ecust.edu.cn](mailto:minbolan@ecust.edu.cn), Tel: +86-21-64253574.*

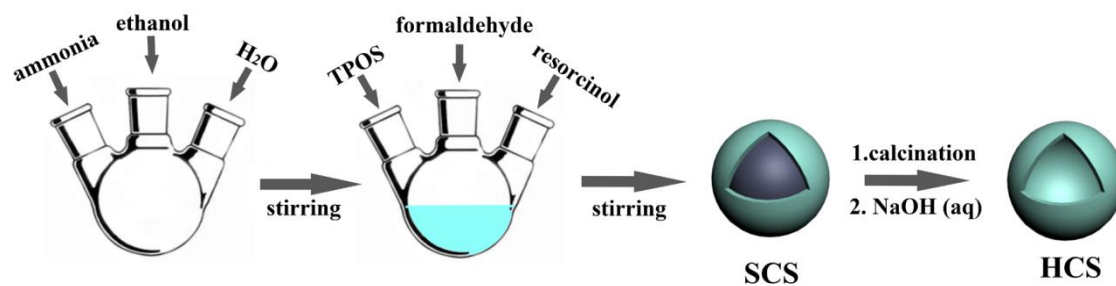

**Figure S1.** The synthesis process of hollow carbon sphere (HCS)

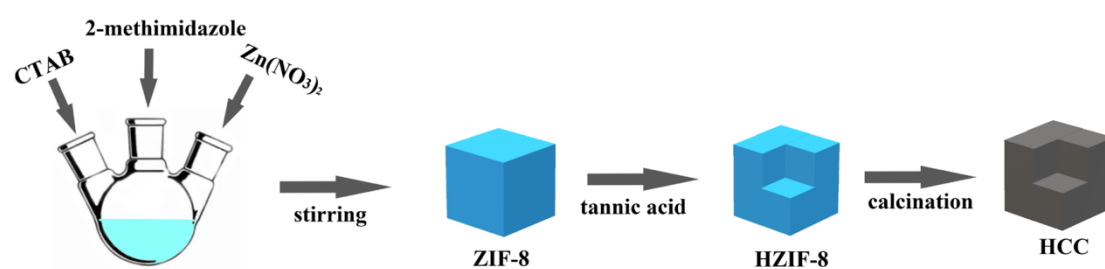

**Figure S2.** The synthesis process of hollow carbon cubic (HCC)

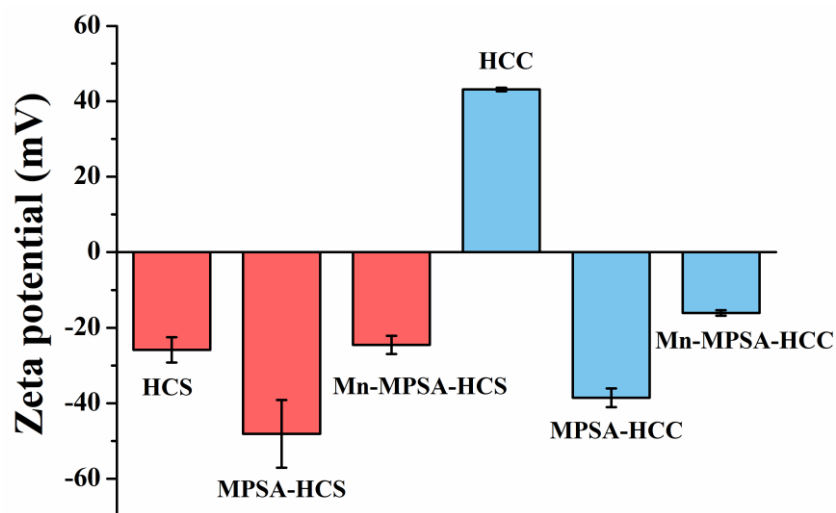

**Figure S3.** The variation of zeta potential during the synthesis process of Mn-MPSA-HCS and Mn-MPSA-HCC.

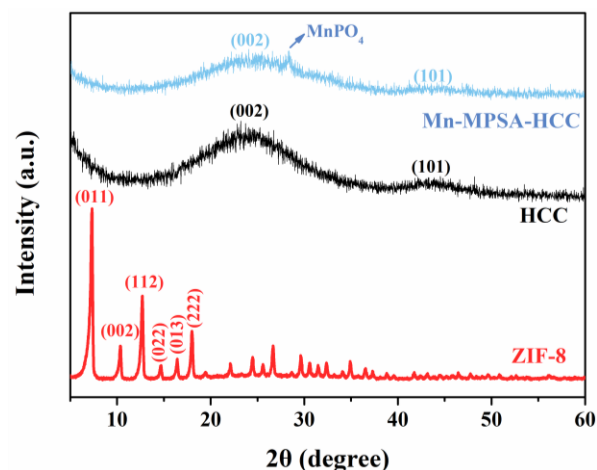

**Figure S4.** The XRD characterization of ZIF-8 and HCC

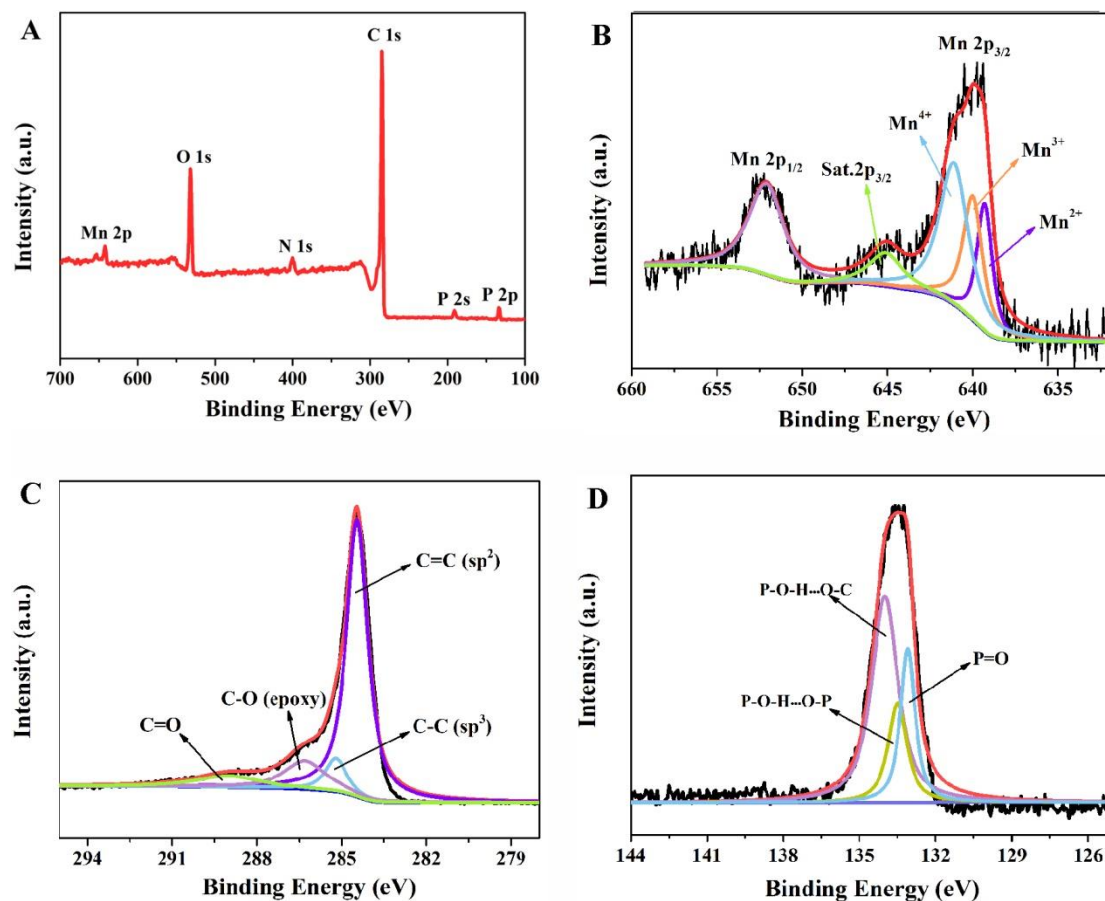

**Figure S5.** The (A) XPS wide range survey and (B) high-resolution Mn 2p spectrum of Mn-MPSA-HCC; the high resolution (C) C 1s and (D) P 2p of Mn-MPSA-HCC

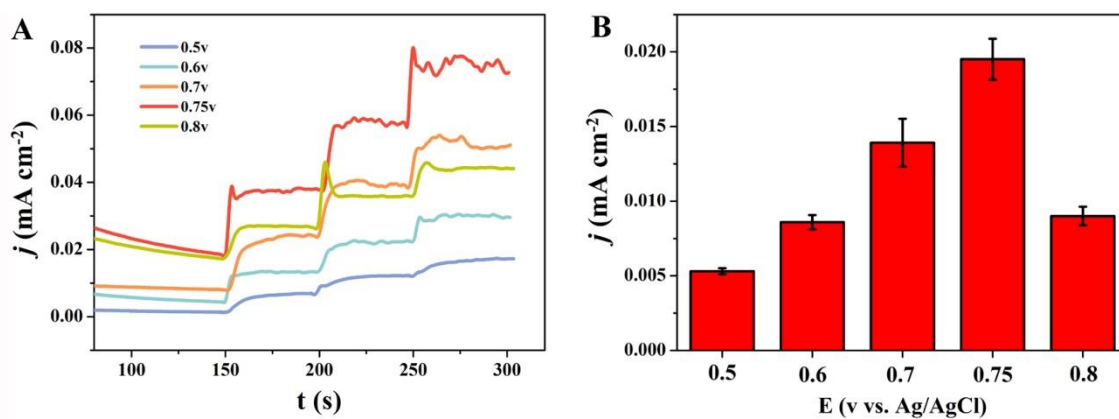

**Figure S6.** The optimization of applied potential of Mn-MPSA-HCS/SPCE in 0.1 M PBS (pH 7.4) at the addition of 0.16 mM superoxide anions at each step

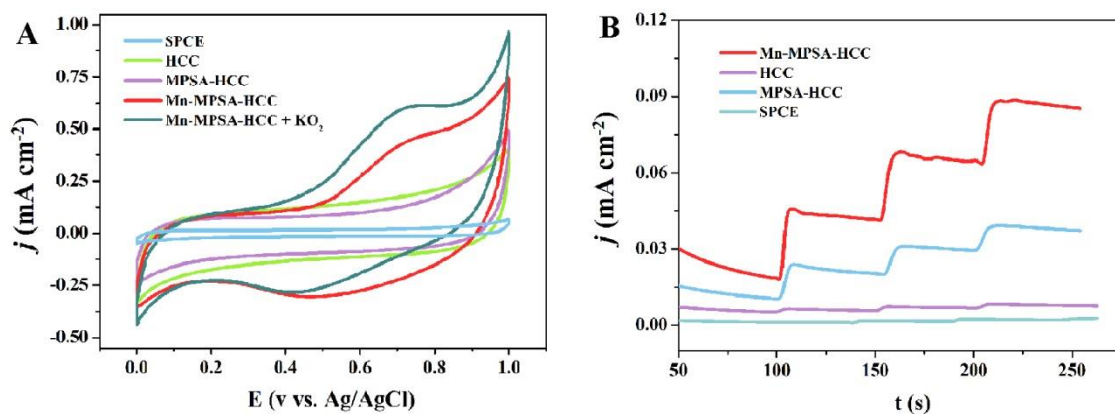

**Figure S7.** The (A) CV curves and (B) current responses of SPCE, HCS/SPCE, MPSA-HCS/SPCE and Mn-MPSA-HCS/SPCE

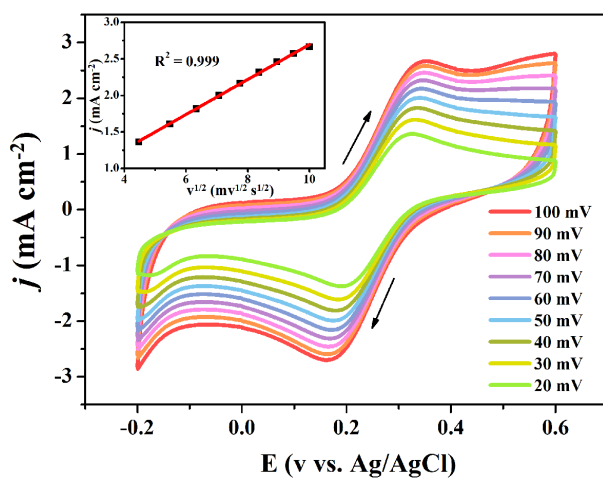

**Figure S8.** The CV curves of Mn-MPSA-HCS/SPCE in 5 M K<sub>3</sub>[Fe(CN)<sub>6</sub>]/ K<sub>4</sub>[Fe(CN)<sub>6</sub>] (contains 0.1 M KCl) at different scan rates

| <b>Materials</b>                  | <b>Applied potential (V)</b> | <b>Sensitivity (<math>\mu\text{A cm}^{-2} \mu\text{M}^{-1}</math>)</b> | <b>Linear range (<math>\mu\text{M}</math>)</b> | <b>Limit of detection (<math>\mu\text{M}</math>)</b> | <b>Ref.</b>      |
|-----------------------------------|------------------------------|------------------------------------------------------------------------|------------------------------------------------|------------------------------------------------------|------------------|
| Mn-MPSA-MWCNTs /SPCE              | 0.7                          | 77.5                                                                   | 0-1817                                         | 0.127                                                | [1]              |
| SOD/PdNPs/C <sub>TF</sub> /SP CEs | 0.2                          | —                                                                      | —                                              | 2.0 ± 0.2                                            | [2]              |
| GNP/Cu-Cys                        | 0.25                         | 18                                                                     | 3.1-326                                        | 2.8                                                  | [3]              |
| Gelatin-ZnO-SOD                   | —                            | —                                                                      | —                                              | 1.64                                                 | [4]              |
| Naringin-Cu                       | 0.123                        | —                                                                      | 0.2-2.8                                        | 0.7                                                  | [5]              |
| SOD/PMMA/PANI-A u                 | 0.3                          | 42.5                                                                   | 0.5-2.4                                        | —                                                    | [6]              |
| <b>Mn-MPSA-HCS /SPCE</b>          | <b>0.75</b>                  | <b>224</b>                                                             | <b>0-1257.4</b>                                | <b>0.00125</b>                                       | <b>This work</b> |

**Table S1.** The analytical performance of various electrodes in previous researches for  $\text{O}_2^{\cdot-}$  sensing.

### References

- [1]. Cai X, Shi L, Sun W, Zhao H, Li H, He H, et al. A facile way to fabricate manganese phosphate self-assembled carbon networks as efficient electrochemical catalysts for real-time monitoring of superoxide anions released from HepG2 cells. *Biosensors & Bioelectronics*. 2018;102:171-8.
- [2]. Barquero-Quiros M, Arcos-Martinez MJ. Effect of Nanoparticles on Modified Screen Printed Inhibition Superoxide Dismutase Electrodes for Aluminum. *Sensors (Basel, Switzerland)*. 2016;16(10).
- [3]. Dashtestani F, Ghourchian H, Eskandari K, Rafiee-Pour HA. A superoxide dismutase mimic nanocomposite for amperometric sensing of superoxide anions. *Microchimica Acta*. 2015;182(5-6):1045-53.
- [4]. Derkus B, Emregul E, Emregul KC. Copper-zinc alloy nanoparticle based enzyme-free superoxide radical sensing on a screen-printed electrode. *Talanta*. 2015;134:206-14.
- [5]. Madhurantakam S, Selvaraj S, Nesakumar N, Sethuraman S, Rayappan JBB, Krishnan UM. Electrochemical enzymeless detection of superoxide employing naringin-copper decorated electrodes. *Biosensors & Bioelectronics*. 2014;59:134-9.

[6]. Santhosh P, Manesh KM, Lee S-H, Uthayakumar S, Gopalan AI, Lee K-P. Sensitive electrochemical detection of superoxide anion using gold nanoparticles distributed poly(methyl methacrylate)-polyaniline core-shell electrospun composite electrode. *Analyst*. 2011;136(8):1557-61.

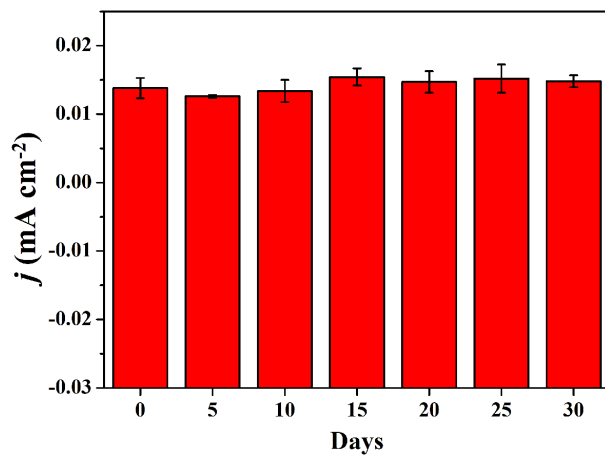

**Figure S9.** The current responses of Mn-MPSA-HCS/SPCE toward 0.16 mM  $O_2^{\bullet-}$  in a month of period
